# Supplementary material for: Growth of CeO2 nanocubes showing size-dependent optical and oxygen evolution reaction behaviors
Source: Royal Society of Chemistry journal article supplement (doi:10.1039/d1dt03150c), 2021-01-01
Supplement: d1dt03150c1.pdf [file d1dt03150c1.pdf]

Electronic Supplementary Information

**Growth of CeO<sub>2</sub> nanocubes showing size-dependent optical and oxygen evolution reaction behaviors**

Shi-Hong Wu,<sup>a</sup> Chien-Hsuan Hsiao,<sup>a</sup> Pei-Lun Hsieh,<sup>b</sup> Xing-Fu Huang<sup>a</sup> and Michael H. Huang<sup>\*a</sup>

<sup>a</sup>*Department of Chemistry and Frontier Research Center on Fundamental and Applied Sciences of Matters, National Tsing Hua University, Hsinchu 30013, Taiwan*

<sup>b</sup>*Department of Materials Science and Engineering, National Tsing Hua University, Hsinchu 30013, Taiwan*

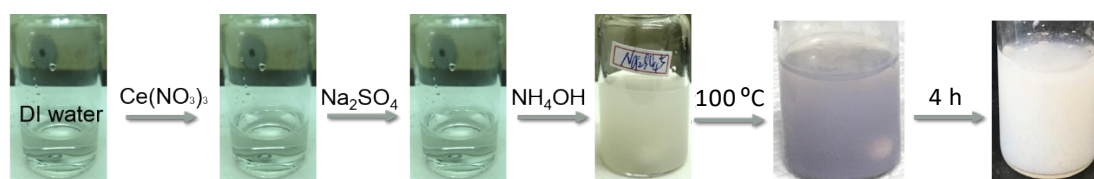

**Fig. S1** Photographs taken in the synthesis of CeO<sub>2</sub> nanocubes.

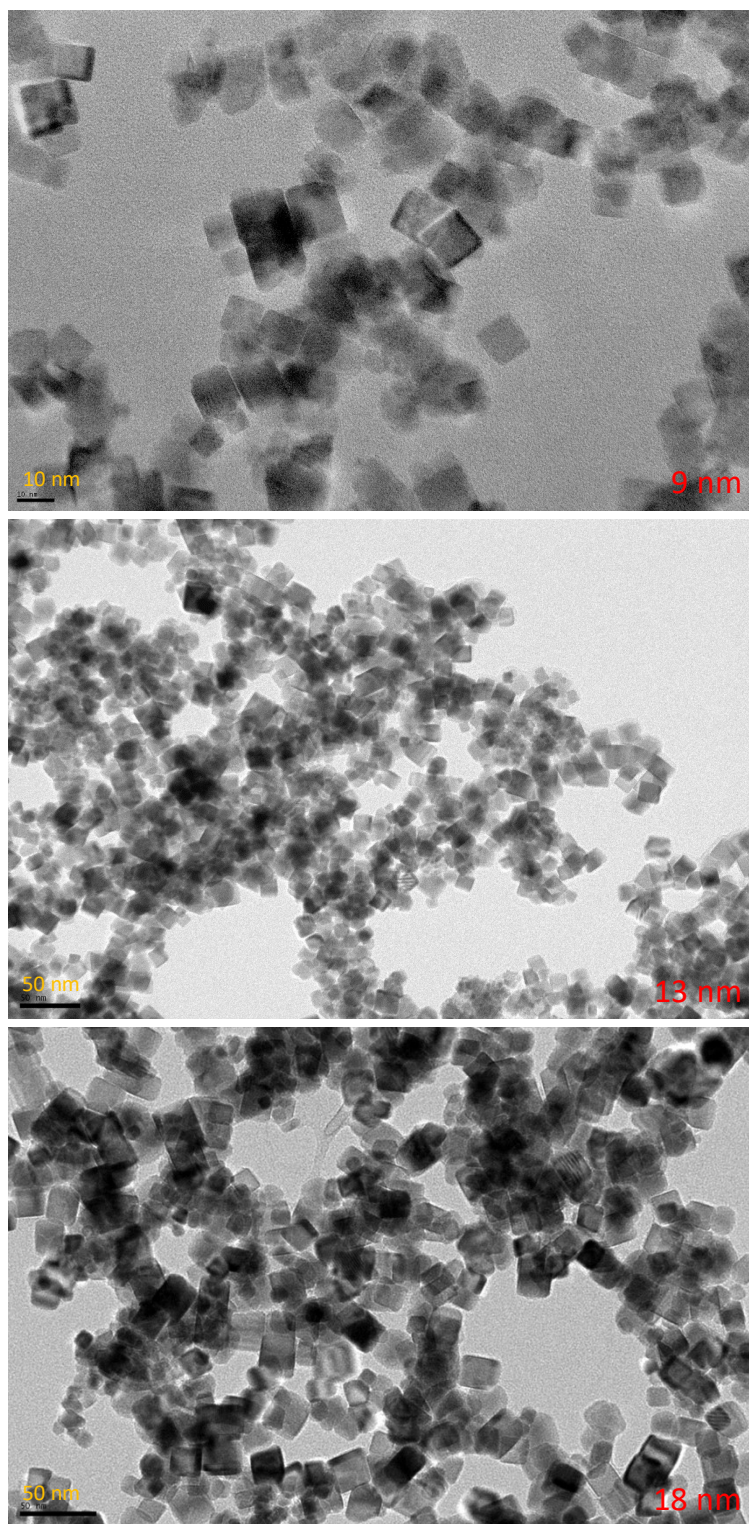

**Fig. S2** Large-area TEM images of different-sized CeO<sub>2</sub> nanocubes.

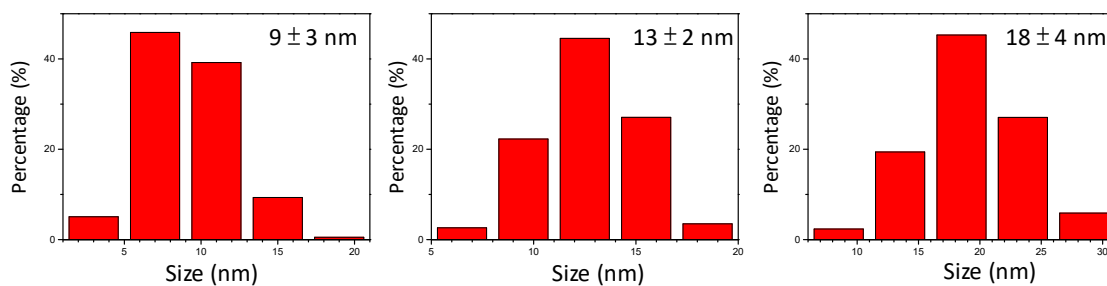

**Fig. S3** Size distribution histograms of the synthesized CeO<sub>2</sub> nanocubes. Average sizes and their standard deviations are provided.

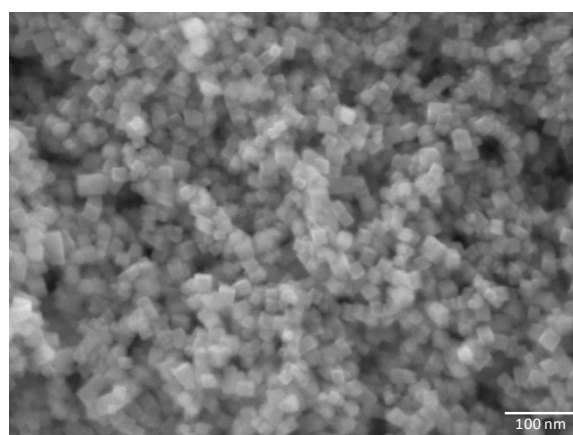

**Fig. S4** SEM image of the synthesized 18 nm CeO<sub>2</sub> nanocubes.

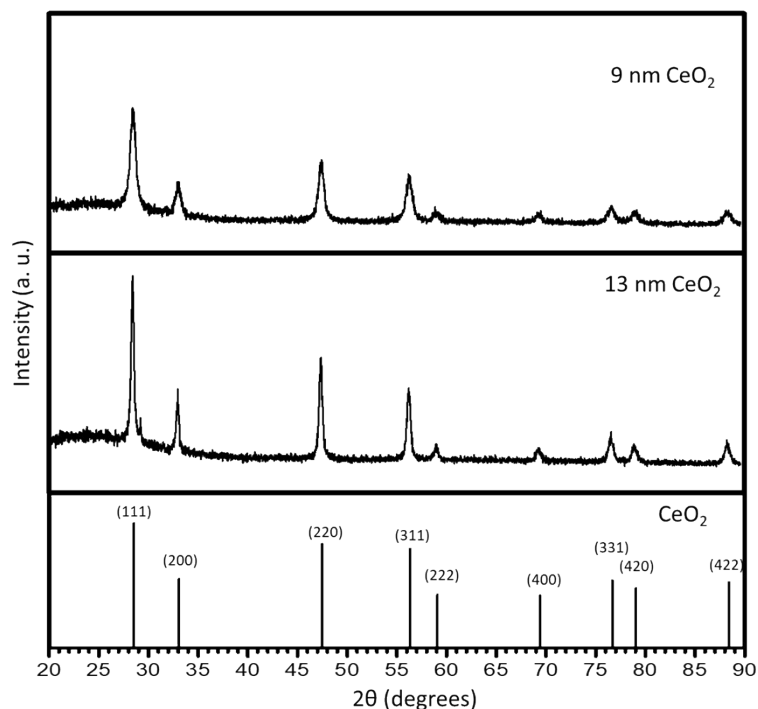

**Fig. S5** XRD patterns of the 9 and 13 nm CeO<sub>2</sub> nanocubes and the standard XRD pattern of CeO<sub>2</sub>. The 9 nm sample shows peak broadening due to the small particle sizes.

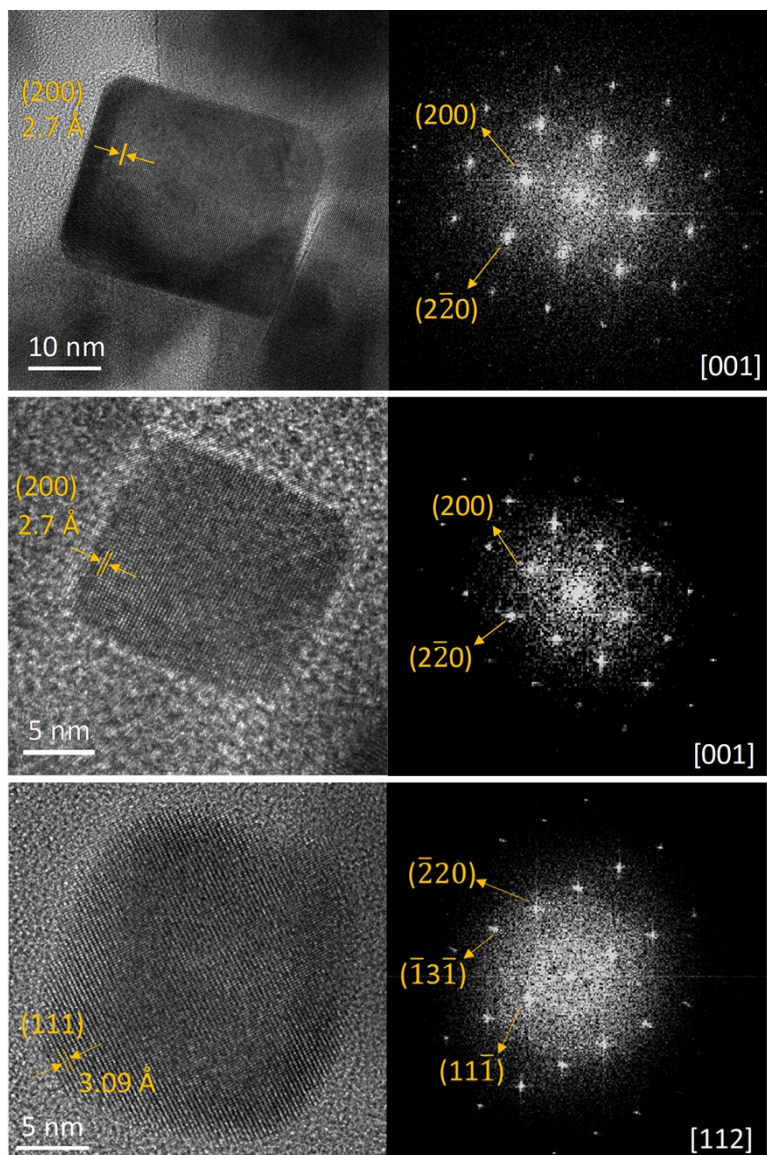

**Fig. S6** Additional HR-TEM images of CeO<sub>2</sub> nanocubes from the 18 nm sample and the FFT patterns. Viewing directions are indicated.

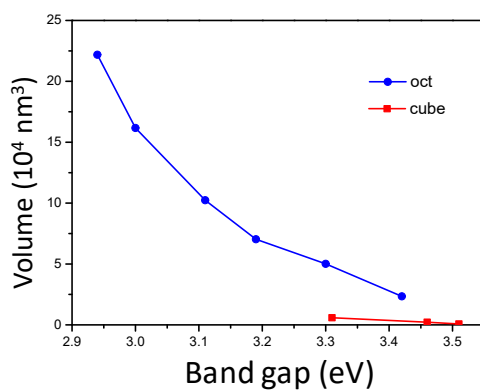

**Fig. S7** Plot of particle volumes vs. band gaps of size-tunable CeO<sub>2</sub> octahedra and



nanocubes.

$$E_c = E_{fb} + \frac{k_B T}{e} \ln \frac{N_D}{N_C}$$

$$N_C = \frac{2(2\pi m^* k_B T)^{3/2}}{h^3}$$

$E_{fb}$ : flat-band potential  
 $k_B$ : Boltzmann's constant  
 $T$ : temperature  
 $e$ : electron charge ( $1.602 \times 10^{-19}$  C)  
 $N_C$ : effective density of states in the conduction band  
 $N_D$ : donor concentration (electron density for n-type semiconductor such as CeO<sub>2</sub>)  
 $m^*$ : effective mass of the electrons ( $0.4 \times 9.109 \times 10^{-31}$  kg)  
 $h$ : Planck's constant

$$\frac{1}{C^2} = \frac{2}{e\epsilon\epsilon_0 N_D} \left( E - E_{fb} - \frac{k_B T}{e} \right)$$

(Mott–Schottky equation)

$E$ : applied potential  
 $C$ : space charge capacitance of the semiconductor  
 $\epsilon$ : the dielectric constant (24.5 for CeO<sub>2</sub>)  
 $\epsilon_0$ : permittivity of the vacuum ( $8.85 \times 10^{-14}$  F cm<sup>-1</sup>)

**Fig. S8** Mott–Schottky equation and other equations used to determine the conduction band energy  $E_c$  of CeO<sub>2</sub> nanocubes.

**Table S1** (upper) Calculations to determine  $E_c$  for different CeO<sub>2</sub> nanocube samples. (lower) Calculations to determine  $E_v$  for different CeO<sub>2</sub> nanocube samples. The solution pH is 6.16, which is used to obtain  $E_c$  in RHE scale.

|              |               | $N_D = \frac{2}{e\epsilon\epsilon_0 \text{slope}}$       |                           |                       |                |                          |                          |
|--------------|---------------|----------------------------------------------------------|---------------------------|-----------------------|----------------|--------------------------|--------------------------|
|              | $E_{fb}$ (eV) | Slope (F <sup>-2</sup> cm <sup>4</sup> V <sup>-1</sup> ) | $N_D$ (cm <sup>-3</sup> ) | $N_C$                 | $\ln(N_D/N_C)$ | $k_B T/e * \ln(N_D/N_C)$ | $E_c$ (vs. Ag/AgCl) (eV) |
| <b>9 nm</b>  | -0.570        | $1.66 \times 10^{10}$                                    | $3.47 \times 10^{20}$     | $6.27 \times 10^{24}$ | -9.80          | -0.251                   | -0.821                   |
| <b>13 nm</b> | -0.630        | $2.60 \times 10^{10}$                                    | $2.21 \times 10^{20}$     |                       | -10.25         | -0.263                   | -0.893                   |
| <b>18 nm</b> | -0.669        | $1.30 \times 10^{10}$                                    | $4.43 \times 10^{20}$     |                       | -9.56          | -0.245                   | -0.914                   |

  

|              | $E$ (V vs. RHE) = $E$ (V vs. Ag/AgCl) + 0.21 + (0.0591 × 6.16) |                      |               |                      |
|--------------|----------------------------------------------------------------|----------------------|---------------|----------------------|
|              | $E_c$ (vs. Ag/AgCl) (eV)                                       | $E_c$ (vs. RHE) (eV) | Band gap (eV) | $E_v$ (vs. RHE) (eV) |
| <b>9 nm</b>  | -0.821                                                         | -0.25                | 3.57          | 3.32                 |
| <b>13 nm</b> | -0.893                                                         | -0.32                | 3.48          | 3.16                 |
| <b>18 nm</b> | -0.914                                                         | -0.34                | 3.45          | 3.11                 |

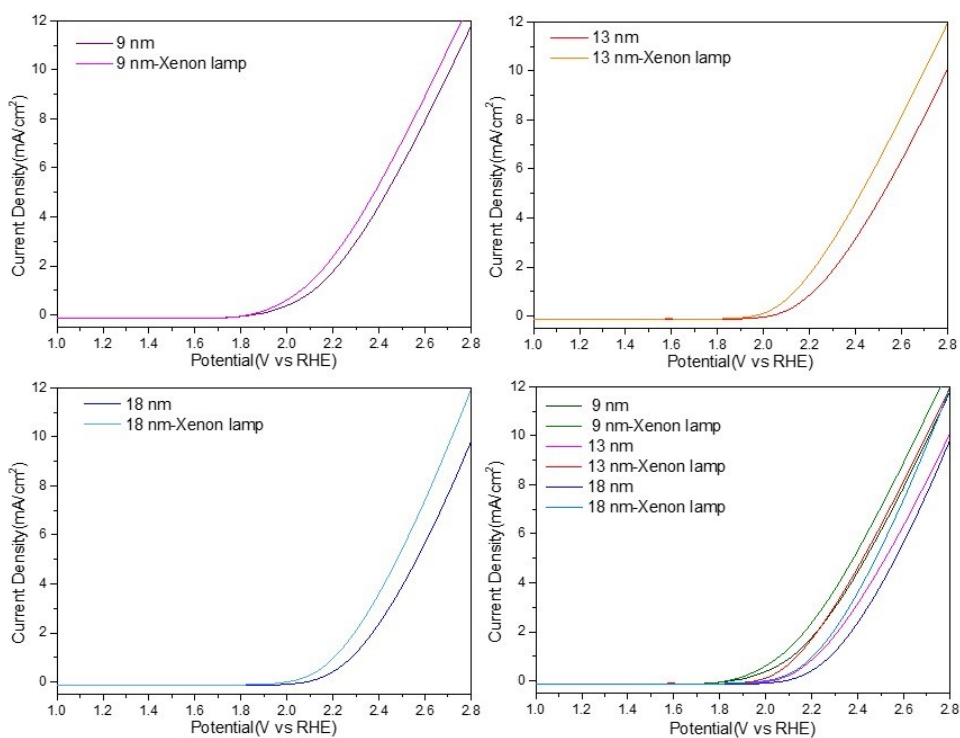

**Fig. S9** Linear sweep voltammetry curves of size-tunable CeO<sub>2</sub> nanocubes before and upon light illumination.

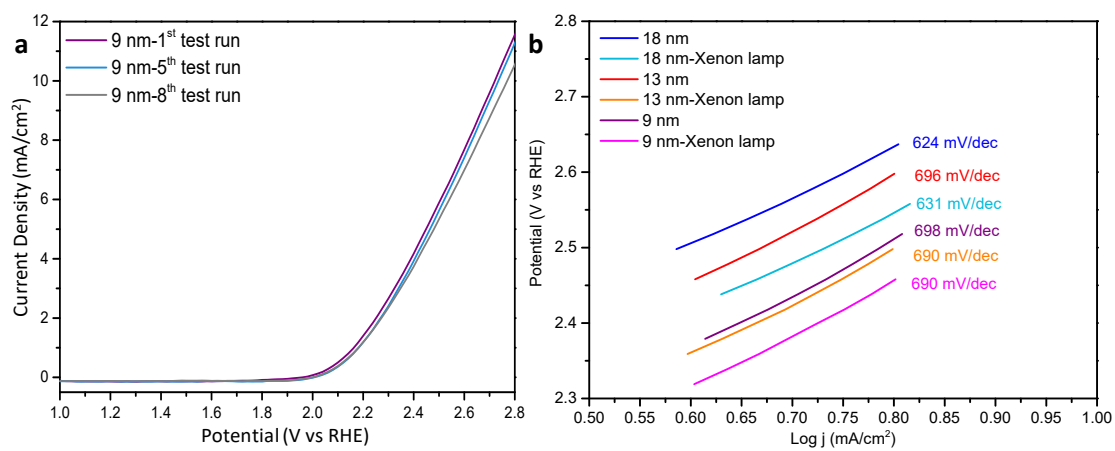

**Fig. S10** (a) Reproducibility test of the measured LSV curves for the 9 nm CeO<sub>2</sub> sample. (b) Tafel plot for the different CeO<sub>2</sub> samples with and without light illumination.
